# Supplementary material
Source: publisher site journal article supplement (https://www.dovepress.com/article/145362)
Supplement: Supplementary file 1 [file get_supplementary_file.php]

## Supplementary Material

**Supplementary Table S1:** Accession numbers of sequences included in this study from GenBank.

| cross-sectional study |                |  | Longitudinal study |                |
|-----------------------|----------------|--|--------------------|----------------|
| Pre-IFN group         | Post-IFN group |  | Pre-IFN group      | Post-IFN group |
| EU234065              | JX463558       |  | EU362899           | EU362876       |
| EU155338              | JX463627       |  | EF407428           | EU362877       |
| EU255979              | JX463541       |  | EU362900           | EU362878       |
| EU255983              | JX463537       |  | EF407452           | EU362879       |
| EU255975              | JX463543       |  | EU362901           | EU362880       |
| EU255969              | JX463602       |  | EU362902           | EU362881       |
| EU255971              | JX463547       |  | EU362903           | EU362883       |
| EU255973              | JX463610       |  | EF407453           | EU362884       |
| EU155343              | EU362892       |  | EU362904           | EU362885       |
| EU255985              | EU362887       |  | EF407435           | EU362886       |
| EU256028              | JX463529       |  | EF407450           | EU362887       |
| EU155291              | JX463587       |  | EU362905           | EU362888       |
| EU255991              | EU362885       |  | EU362906           | EU362889       |
| EU256010              | JX463575       |  | EU362907           | EU362890       |
| EU155288              | JX463534       |  | EU362908           | EU362891       |
| EU155320              | JX463608       |  | EF407438           | EU362892       |
| EU239715              | JX463568       |  | EU362909           | EU362893       |
| EU256016              | JX463636       |  | EU362910           | EU362894       |
| EU256039              | JX463570       |  | EU362911           | EU362895       |
| EU482876              | JX463631       |  | EF407433           | EU362896       |
| EU781801              | JX463583       |  |                    |                |
| EU781823              | JX463632       |  |                    |                |
| EU155296              | JX463565       |  |                    |                |
| EU155244              | JX463633       |  |                    |                |
| EU255977              | JX463553       |  |                    |                |
| EU260396              | JX463612       |  |                    |                |
| EU482878              | EU362876       |  |                    |                |
| EU155267              | JX463550       |  |                    |                |
| EU155251              | JX463595       |  |                    |                |
| EU482843              | EU362878       |  |                    |                |
| EU781776              | EU362884       |  |                    |                |
| EU781783              | JX463525       |  |                    |                |
| EU781814              | JX463546       |  |                    |                |
| EF407432              | EU362891       |  |                    |                |

|          |          |  |  |  |
|----------|----------|--|--|--|
| EU362899 | JX463544 |  |  |  |
| EF407437 | JX463603 |  |  |  |
| EU362900 | JX463530 |  |  |  |
| EU255931 | JX463589 |  |  |  |
| EU781751 | JX463582 |  |  |  |
| EU781784 | JX463629 |  |  |  |
| EU155344 | EU362896 |  |  |  |
| EU482852 | JX463637 |  |  |  |
| EU155342 | JX463527 |  |  |  |
| EU781754 | JX463599 |  |  |  |
| EU155245 | JX463563 |  |  |  |
| EU155246 | JX463616 |  |  |  |
| EU155339 | JX463535 |  |  |  |
| EU155354 | JX463607 |  |  |  |
| EU255968 | JX463561 |  |  |  |
| EU255974 | JX463551 |  |  |  |
| EU255965 | JX463604 |  |  |  |
| EU255981 | JX463584 |  |  |  |
| EF407438 | JX463638 |  |  |  |
| EF407450 | JX463581 |  |  |  |
| EU256026 | JX463621 |  |  |  |
| EU255980 | JX463580 |  |  |  |
| EU781764 | JX463623 |  |  |  |
| EU255963 | JX463548 |  |  |  |
| EU482873 | JX463609 |  |  |  |
| EU781805 | JX463578 |  |  |  |
| EU569722 | JX463622 |  |  |  |
| EU255976 | JX463579 |  |  |  |
| EU255986 | JX463640 |  |  |  |
| EU256032 | JX463539 |  |  |  |
| EU255988 | JX463576 |  |  |  |
| EU781747 | JX463641 |  |  |  |
| EU482841 | JX463569 |  |  |  |
| EU781760 | JX463624 |  |  |  |
| EU781761 | JX463572 |  |  |  |
| EU781782 | JX463628 |  |  |  |
| EU155321 | EU362877 |  |  |  |
| EU781800 | JX463533 |  |  |  |
| EU482850 | JX463593 |  |  |  |
| EU155292 | JX463573 |  |  |  |
| EU781804 | JX463634 |  |  |  |
| EF407445 | JX463545 |  |  |  |
| EU362904 | JX463605 |  |  |  |

|          |          |  |  |  |
|----------|----------|--|--|--|
| EU482862 | EU362895 |  |  |  |
| EU255978 | JX463571 |  |  |  |
| EU155252 | JX463625 |  |  |  |
| EF407442 | JX463574 |  |  |  |
| EU781820 | JX463635 |  |  |  |
| EF407430 | JX463566 |  |  |  |
| EU362908 | JX463630 |  |  |  |
| EU256018 | EU362879 |  |  |  |
| EU256044 | EU362881 |  |  |  |
| EU256041 | EU362890 |  |  |  |
| EU155286 | EU362883 |  |  |  |
| EU256094 | EU362894 |  |  |  |
| EU529679 | EU362886 |  |  |  |
| EU155238 | EU362889 |  |  |  |
| EU482870 | EU362893 |  |  |  |
| EF407440 | JX463528 |  |  |  |
| EU362907 | JX463588 |  |  |  |
| EU155250 | JX463536 |  |  |  |
| EU781797 | JX463594 |  |  |  |
| EU482837 | JX463552 |  |  |  |
| EU255935 | JX463591 |  |  |  |
| EU255938 | JX463562 |  |  |  |
| EU256011 | JX463555 |  |  |  |
| EU256051 | JX463614 |  |  |  |
| EU256008 | JX463560 |  |  |  |
| EU529677 | JX463626 |  |  |  |
| EU155239 | JX463532 |  |  |  |
| EU155340 | JX463592 |  |  |  |
| EU256012 | JX463556 |  |  |  |
| EU256095 | JX463613 |  |  |  |
| EU255932 | JX463557 |  |  |  |
| EU781815 | JX463617 |  |  |  |
| EU255990 | JX463615 |  |  |  |
| EU255998 | JX463549 |  |  |  |
| EU256030 | JX463611 |  |  |  |
| EU482868 | JX463564 |  |  |  |
| EU256027 | JX463619 |  |  |  |
| EU256037 | JX463538 |  |  |  |
| EU482864 | JX463598 |  |  |  |
| EU781811 | JX463542 |  |  |  |
| EU482866 | JX463590 |  |  |  |
| EU256014 | JX463526 |  |  |  |
| EU256038 | JX463597 |  |  |  |

|          |          |  |  |  |
|----------|----------|--|--|--|
| EU781770 | JX463577 |  |  |  |
| EU482847 | JX463639 |  |  |  |
| EF407449 | JX463567 |  |  |  |
| EU362902 | JX463620 |  |  |  |
| EU781773 | JX463540 |  |  |  |
| EU482838 | JX463596 |  |  |  |
| EU155274 | JX463554 |  |  |  |
| EU155293 | JX463531 |  |  |  |
| EU155237 | JX463606 |  |  |  |
| EU781803 | EU362888 |  |  |  |
| EF407433 | EU362880 |  |  |  |
| EU255994 |          |  |  |  |
| EU569723 |          |  |  |  |
| EU255940 |          |  |  |  |
| EU255941 |          |  |  |  |
| EU255992 |          |  |  |  |
| EF407456 |          |  |  |  |
| EU362903 |          |  |  |  |
| EU595698 |          |  |  |  |
| EU256031 |          |  |  |  |
| EF407455 |          |  |  |  |
| EU256013 |          |  |  |  |
| EU256067 |          |  |  |  |
| EU781746 |          |  |  |  |
| EU781812 |          |  |  |  |
| EU255997 |          |  |  |  |
| EU256058 |          |  |  |  |
| EU781774 |          |  |  |  |
| EF407441 |          |  |  |  |
| EU155236 |          |  |  |  |
| EU155287 |          |  |  |  |
| EU781763 |          |  |  |  |
| EU155290 |          |  |  |  |
| EU155378 |          |  |  |  |
| EU781809 |          |  |  |  |
| EU256097 |          |  |  |  |
| EU781813 |          |  |  |  |
| EU155309 |          |  |  |  |
| EU256087 |          |  |  |  |
| EU781791 |          |  |  |  |
| EU250017 |          |  |  |  |
| EU155248 |          |  |  |  |
| EU256060 |          |  |  |  |

|          |  |  |  |  |
|----------|--|--|--|--|
| EU781756 |  |  |  |  |
| EU256048 |  |  |  |  |
| EF407444 |  |  |  |  |
| EU362906 |  |  |  |  |
| EU781762 |  |  |  |  |
| EU781794 |  |  |  |  |
| EU781799 |  |  |  |  |
| EU155276 |  |  |  |  |
| EU781772 |  |  |  |  |
| EU482861 |  |  |  |  |
| EU255936 |  |  |  |  |
| EU256050 |  |  |  |  |
| EU781755 |  |  |  |  |
| EU256104 |  |  |  |  |
| EU781785 |  |  |  |  |
| EU781802 |  |  |  |  |
| EU781786 |  |  |  |  |
| EU781798 |  |  |  |  |
| EU482845 |  |  |  |  |
| EF407453 |  |  |  |  |
| EU155311 |  |  |  |  |
| EU256052 |  |  |  |  |
| EF407446 |  |  |  |  |
| EU155266 |  |  |  |  |
| EU482884 |  |  |  |  |
| EU256036 |  |  |  |  |
| EU781821 |  |  |  |  |
| EU256043 |  |  |  |  |
| EU256009 |  |  |  |  |
| EU529680 |  |  |  |  |
| EU256020 |  |  |  |  |
| EU256019 |  |  |  |  |
| EU781768 |  |  |  |  |
| EU155310 |  |  |  |  |
| EF407454 |  |  |  |  |
| EU482836 |  |  |  |  |
| EU256035 |  |  |  |  |
| EU155285 |  |  |  |  |
| EU255934 |  |  |  |  |
| EU256040 |  |  |  |  |
| EU155249 |  |  |  |  |
| EU781777 |  |  |  |  |
| EU256070 |  |  |  |  |

|          |  |  |  |  |
|----------|--|--|--|--|
| EU781793 |  |  |  |  |
| EU256024 |  |  |  |  |
| EU255953 |  |  |  |  |
| EU482865 |  |  |  |  |
| EU482863 |  |  |  |  |
| EU155275 |  |  |  |  |
| EU256015 |  |  |  |  |
| EU256073 |  |  |  |  |
| EU781822 |  |  |  |  |
| EF407428 |  |  |  |  |
| EF407443 |  |  |  |  |
| EU482856 |  |  |  |  |
| EU255942 |  |  |  |  |
| EU155271 |  |  |  |  |
| EU255956 |  |  |  |  |
| EU256047 |  |  |  |  |
| EU155216 |  |  |  |  |
| EF407451 |  |  |  |  |
| EU362910 |  |  |  |  |
| EU482882 |  |  |  |  |
| EU234063 |  |  |  |  |
| EU781750 |  |  |  |  |
| EU781780 |  |  |  |  |
| EU256005 |  |  |  |  |
| EU529676 |  |  |  |  |
| EU255993 |  |  |  |  |
| EU255933 |  |  |  |  |
| EF407429 |  |  |  |  |
| EU362911 |  |  |  |  |
| EU781748 |  |  |  |  |
| EU781749 |  |  |  |  |
| EU256068 |  |  |  |  |
| EU155380 |  |  |  |  |
| EU256074 |  |  |  |  |
| EU781789 |  |  |  |  |
| EF407457 |  |  |  |  |
| EU256057 |  |  |  |  |
| EU155272 |  |  |  |  |
| EU781787 |  |  |  |  |
| EU482857 |  |  |  |  |
| EU155278 |  |  |  |  |
| EU155297 |  |  |  |  |
| EU781769 |  |  |  |  |

|          |  |  |  |  |
|----------|--|--|--|--|
| EU155298 |  |  |  |  |
| EU781775 |  |  |  |  |
| EU781766 |  |  |  |  |
| EU781792 |  |  |  |  |
| EU781758 |  |  |  |  |
| EF407452 |  |  |  |  |
| EU256017 |  |  |  |  |
| EU256002 |  |  |  |  |
| EU155270 |  |  |  |  |
| EU256096 |  |  |  |  |
| EF407448 |  |  |  |  |
| EU482848 |  |  |  |  |
| EU155215 |  |  |  |  |
| EU256003 |  |  |  |  |
| EU256033 |  |  |  |  |
| EU155313 |  |  |  |  |
| EU781819 |  |  |  |  |
| EU781806 |  |  |  |  |
| EU239716 |  |  |  |  |
| EF407447 |  |  |  |  |
| EU482846 |  |  |  |  |
| EU155299 |  |  |  |  |
| EU256106 |  |  |  |  |
| EU155294 |  |  |  |  |
| EU239713 |  |  |  |  |
| EU234064 |  |  |  |  |
| EU255989 |  |  |  |  |
| EU155341 |  |  |  |  |
| EU256006 |  |  |  |  |
| EU660383 |  |  |  |  |
| EU255982 |  |  |  |  |
| EU155322 |  |  |  |  |
| EU256029 |  |  |  |  |
| EU256022 |  |  |  |  |
| EU256034 |  |  |  |  |
| EF407427 |  |  |  |  |
| EU362905 |  |  |  |  |
| EU255939 |  |  |  |  |
| EU255970 |  |  |  |  |
| EU255966 |  |  |  |  |
| EU255987 |  |  |  |  |
| EU781810 |  |  |  |  |
| EU482867 |  |  |  |  |

|          |  |  |  |  |
|----------|--|--|--|--|
| EU255995 |  |  |  |  |
| EU256021 |  |  |  |  |
| EU255964 |  |  |  |  |
| EF407431 |  |  |  |  |
| EU482834 |  |  |  |  |
| EU155213 |  |  |  |  |
| EU256023 |  |  |  |  |
| EU482842 |  |  |  |  |
| EU781795 |  |  |  |  |
| EU781788 |  |  |  |  |
| EU781753 |  |  |  |  |
| EU781779 |  |  |  |  |
| EU781816 |  |  |  |  |
| EU155289 |  |  |  |  |
| EU781759 |  |  |  |  |
| EU781778 |  |  |  |  |
| EU155243 |  |  |  |  |
| EU155269 |  |  |  |  |
| EU529681 |  |  |  |  |
| EU255929 |  |  |  |  |
| EU781771 |  |  |  |  |
| EU255949 |  |  |  |  |
| EU256071 |  |  |  |  |
| EU256004 |  |  |  |  |
| EU155351 |  |  |  |  |
| EU255928 |  |  |  |  |
| EU255952 |  |  |  |  |
| EU255945 |  |  |  |  |
| EU256049 |  |  |  |  |
| EU155282 |  |  |  |  |
| EU155295 |  |  |  |  |
| EF407436 |  |  |  |  |
| EU362909 |  |  |  |  |
| EU529678 |  |  |  |  |
| EU781767 |  |  |  |  |
| EU482869 |  |  |  |  |
| EU155233 |  |  |  |  |
| EF407439 |  |  |  |  |
| EU155242 |  |  |  |  |
| EU660384 |  |  |  |  |
| EU155240 |  |  |  |  |
| EU255996 |  |  |  |  |
| EU256025 |  |  |  |  |



|          |  |  |  |  |
|----------|--|--|--|--|
| EU482844 |  |  |  |  |
| EU155345 |  |  |  |  |
| EU482853 |  |  |  |  |
| EU155352 |  |  |  |  |
| EU255943 |  |  |  |  |
| EU255947 |  |  |  |  |
| EU482858 |  |  |  |  |
| EU255954 |  |  |  |  |
| EU155346 |  |  |  |  |
| EU255927 |  |  |  |  |
| EU255957 |  |  |  |  |
| EU256069 |  |  |  |  |
| EU255946 |  |  |  |  |
| EU155353 |  |  |  |  |
| EU155355 |  |  |  |  |
| EU255944 |  |  |  |  |
| EU256107 |  |  |  |  |
| EU660385 |  |  |  |  |
| EU155349 |  |  |  |  |
| EU482831 |  |  |  |  |
| EU155348 |  |  |  |  |
| EU255955 |  |  |  |  |
| EU256072 |  |  |  |  |
| EU482872 |  |  |  |  |
| EU482854 |  |  |  |  |
| EU781765 |  |  |  |  |
| EU155277 |  |  |  |  |
| EU781796 |  |  |  |  |
| EU482840 |  |  |  |  |
| EU482832 |  |  |  |  |
| EU260395 |  |  |  |  |
| EU781790 |  |  |  |  |
| EU781818 |  |  |  |  |
| EU781817 |  |  |  |  |
| EU781808 |  |  |  |  |
| EU781807 |  |  |  |  |
| EU256046 |  |  |  |  |
| EU155283 |  |  |  |  |
| EU155268 |  |  |  |  |
| EU255984 |  |  |  |  |
| EF407435 |  |  |  |  |
| EU482871 |  |  |  |  |
| EU482855 |  |  |  |  |

|          |  |  |  |  |
|----------|--|--|--|--|
| EU155347 |  |  |  |  |
| EU255951 |  |  |  |  |
| EU781752 |  |  |  |  |
| EU781757 |  |  |  |  |
| EU255930 |  |  |  |  |
| EU155323 |  |  |  |  |
| EU155319 |  |  |  |  |
| EU255937 |  |  |  |  |
| EU255999 |  |  |  |  |
| EU482835 |  |  |  |  |
| EU595697 |  |  |  |  |
| EU256053 |  |  |  |  |
| EU255958 |  |  |  |  |
| EU781781 |  |  |  |  |
| EF407434 |  |  |  |  |
| EU362901 |  |  |  |  |
| EU256007 |  |  |  |  |
| EU155314 |  |  |  |  |
| EU255948 |  |  |  |  |
| EU595699 |  |  |  |  |
| EU155214 |  |  |  |  |
| EU781824 |  |  |  |  |
| EU255950 |  |  |  |  |
| EU155284 |  |  |  |  |
| EU256105 |  |  |  |  |
